# Supplementary material
Source: PubMed Central journal article supplement (PMC9014398)
Supplement: NIHMS1783163-supplement-Tables_S1-S4.pdf [file NIHMS1783163-supplement-Tables_S1-S4.pdf]

Supplementary Materials for  
**Pembrolizumab induces HIV latency reversal in people living with HIV and cancer on antiretroviral therapy**

Thomas S. Uldrick *et al.*

Corresponding author: Thomas S. Uldrick, [tuldrick@fredhutch.org](mailto:tuldrick@fredhutch.org); Sharon R. Lewin, [sharon.lewin@unimelb.edu.au](mailto:sharon.lewin@unimelb.edu.au)

*Sci. Transl. Med.* **14**, eabl3836 (2022)  
DOI: 10.1126/scitranslmed.abl3836

**The PDF file includes:**

Tables S1 to S4

**Other Supplementary Material for this manuscript includes the following**

Data file S1

MDAR Reproducibility Checklist

**Table S1. Participant baseline characteristics, treatments and cancer outcomes**

| ID | Age (years) | CD4 <sup>+</sup> T cells (cells/mL) | CD4:CD8 Ratio | HIV RNA >LLD | ART                  | Cancer                | Prior Cancer Therapy       | Cycles Pembro (n) | Best Response to Pembro |
|----|-------------|-------------------------------------|---------------|--------------|----------------------|-----------------------|----------------------------|-------------------|-------------------------|
| 1  | 71          | 477                                 | 0.90          | NO           | RAL, 3TC, ABC,       | Bladder               | Chemo                      | 10                | SD                      |
| 2  | 58          | 271                                 | 0.71          | NO           | DRV, EVG/c, FTC, TAF | HCC                   | Chemo, TKI                 | 11                | SD                      |
| 3  | 53          | 298                                 | 0.32          | NO           | EFV, FTC, TAF, ABC   | Lung                  | Chemo                      | 35                | CR                      |
| 4  | 47          | 132                                 | 0.41          | NO           | DTG, FTC, TAF        | PEL                   | Chemo, mAb, IMiD, XRT      | 13                | PR                      |
| 5  | 59          | 144                                 | 0.56          | NO           | NVP, FTC, TAF        | Anal                  | Chemo, XRT                 | 6                 | SD                      |
| 6  | 54          | 184                                 | 0.72          | NO           | RPV, FTC, TDF        | Anal                  | Chemo, XRT                 | 5                 | PD                      |
| 7  | 50          | 220                                 | 0.26          | NO           | EFV, FTC, TDF        | Tonsil                | mAb                        | 2                 | SD                      |
| 8  | 68          | 164                                 | 0.47          | NO           | DTG, ABC, 3TC        | Anal                  | Chemo, XRT, IMiD           | 2                 | PD                      |
| 9  | 46          | 249                                 | 0.50          | NO           | MVC, FTC, TAF        | SCC Skin              | Chemo, XRT                 | 4                 | SD                      |
| 10 | 53          | 204                                 | 0.21          | NO           | DTG, FTC, TDF        | DLBCL                 | Chemo, mAb, ACST           | 7                 | SD                      |
| 11 | 53          | 382                                 | 1.61          | NO           | RPV, FTC, TDF        | Lung                  | Surgery only               | 2                 | PD                      |
| 12 | 56          | 343                                 | 0.68          | NO           | EFV, FTC, TDF        | Anal                  | Chemo, XRT                 | 1                 | PD                      |
| 13 | 58          | 698                                 | 0.82          | NO           | DRV/r, DTG, FTC, TDF | KS                    | Chemo, XRT                 | 6                 | SD                      |
| 14 | 61          | 226                                 | 0.84          | YES          | DRV/c, FTC, TAF      | Cholangiocarcinoma    | Chemo                      | 4                 | PD                      |
| 15 | 62          | 600                                 | 1.97          | NO           | EFV, FTC, TDF        | Pancreatic            | Chemo                      | 3                 | PD                      |
| 16 | 43          | 228                                 | 0.39          | NO           | DTG, DRV/r, FTC, TDF | PEL                   | Chemo, mAb, XRT            | 6                 | SD                      |
| 17 | 77          | 226                                 | 0.33          | NO           | DTG,3TC              | Anal                  | Chemo                      | 2                 | NA                      |
| 18 | 73          | 321                                 | 1.83          | YES          | RAL, FDC, TDF        | Prostate              | Endo, Chemo, PARPi         | 6                 | SD                      |
| 19 | 48          | 211                                 | 0.28          | NO           | DTG, ATZ/c, TDF      | KS                    | Chemo, XRT                 | 30                | PR                      |
| 20 | 61          | 210                                 | 0.48          | NO           | DTG, FTC, TDF        | KS                    | Chemo, IMiD, XRT           | 5                 | PD                      |
| 22 | 59          | 374                                 | 1.65          | NO           | EVG/c, FTC, TAF      | KS                    | Chemo, TKI, mAb, IMiD, XRT | 2                 | SD                      |
| 23 | 58          | 495                                 | 0.48          | NO           | DTG, FTC, TDF        | KS                    | Chemo, IMiD, XRT           | 4                 | SD                      |
| 24 | 66          | 351                                 | 0.35          | NO           | DTG, ABC, 3TC        | Adenocystic Carcinoma | Chemo                      | 35                | SD                      |
| 25 | 42          | 468                                 | 1.33          | NO           | DTG, FTC, TAF        | KS                    | Chemo, XRT                 | 30                | PR                      |
| 26 | 71          | 536                                 | 0.94          | NO           | EVG/c, FTC, TAF      | Bladder               | Chemo                      | 6                 | SD                      |
| 27 | 52          | 557                                 | 0.34          | YES          | DRV/c, DTG, ABC      | DLBCL                 | Chemo, mAb                 | 15                | PR                      |
| 28 | 53          | 153                                 | 0.52          | NO           | DTG, FTC, TAF        | SCC Skin              | Chemo                      | 2                 | PD                      |
| 29 | 39          | 152                                 | 0.47          | NO           | EVG/c, FTC, TAF      | Anal                  | Chemo                      | 3                 | SD                      |
| 30 | 49          | 966                                 | 0.87          | NO           | BIC, FTC, TAF        | SCC Skin              | None                       | 2                 | PD                      |
| 31 | 62          | 104                                 | 0.35          | NO           | DTG, ETR, DRV/r      | Osteosarcoma          | XRT, Chemo                 | 2                 | NA                      |
| 32 | 45          | 195                                 | 0.35          | NO           | DTG, FTC, TAF        | Breast                | Chemo                      | 1                 | NA                      |
| 33 | 47          | 187                                 | 1.61          | NO           | DRV/c, ABC, 3TC      | Anal                  | XRT, Chemo                 | 3                 | PD                      |

LLD, lower limit of detection of the commercial HIV assay; Pembro, pembrolizumab; ART, antiretroviral therapy; 3TC, lamivudine; ABV, abacavir; ATV, atazanavir; BIC, bictegravir; /c, combined with cobicstat; DTG, dolutegravir; DRV, darunavir; EFV, efavirenz; EVG, elvitegravir; FTC, emtricitabine; ETR, etravirine; MVC, maraviroc; NVP, nevirapine; /r combined with ritonavir; RAL, raltegravir; RPV, rilpivirine. TAF, tenofovir alafenamide; TDF, tenofovir disoprofil fumarate; HCC, hepatocellular carcinoma; PEL, primary effusion lymphoma; KS, Kaposi sarcoma; DLBCL, diffuse large B-cell lymphoma; SCC, squamous cell carcinoma; Chemo, chemotherapy; Endo, endocrine therapy; IMiD, immune modulatory derivative of thalidomide (lenalidomide, pomali domide); mAb, monoclonal antibody (rituximab); TKI, tyrosine kinase inhibitor, PARPi, PARP inhibitor; XRT, radiation therapy; ASCT, autologous stem cell transplant; CR, complete response; PR, partial response, SD, stable disease; PD, progressive disease; NA, not available or not evaluable.

**Table S2. Pairwise comparison of HIV parameters quantified at baseline and 8 days following administration of the initial dose of pembrolizumab.**

| <b>Baseline</b>       |                          |          |                          |          |                          |          |                          |          |  |
|-----------------------|--------------------------|----------|--------------------------|----------|--------------------------|----------|--------------------------|----------|--|
|                       | <b>Plasma HIV RNA</b>    |          | <b>US HIV RNA</b>        |          | <b>MS HIV RNA</b>        |          | <b>HIV DNA</b>           |          |  |
|                       | <b><math>\rho</math></b> | <b>P</b> | <b><math>\rho</math></b> | <b>P</b> | <b><math>\rho</math></b> | <b>P</b> | <b><math>\rho</math></b> | <b>P</b> |  |
| <b>Plasma HIV RNA</b> | 1                        | na       |                          |          |                          |          |                          |          |  |
| <b>US HIV RNA</b>     | 0.42                     | 0.049    | 1                        | na       |                          |          |                          |          |  |
| <b>MS HIV RNA</b>     | 0.039                    | 0.87     | 0.084                    | 0.73     | 1                        | na       |                          |          |  |
| <b>HIV DNA</b>        | 0.28                     | 0.15     | 0.17                     | 0.43     | 0.14                     | 0.53     | 1                        | na       |  |
| <b>Day 8</b>          |                          |          |                          |          |                          |          |                          |          |  |
|                       | <b>Plasma HIV RNA</b>    |          | <b>US HIV RNA</b>        |          | <b>MS HIV RNA</b>        |          | <b>HIV DNA</b>           |          |  |
|                       | <b><math>\rho</math></b> | <b>P</b> | <b><math>\rho</math></b> | <b>P</b> | <b><math>\rho</math></b> | <b>P</b> | <b><math>\rho</math></b> | <b>P</b> |  |
| <b>Plasma HIV RNA</b> | 1                        | na       |                          |          |                          |          |                          |          |  |
| <b>US HIV RNA</b>     | 0.52                     | 0.013    | 1                        | na       |                          |          |                          |          |  |
| <b>MS HIV RNA</b>     | 0.22                     | 0.38     | 0.77                     | 0.75     | 1                        | na       |                          |          |  |
| <b>HIV DNA</b>        | 0.15                     | 0.48     | 0.22                     | 0.26     | 0.13                     | 0.56     | 1                        | na       |  |

US, unspliced; MS, multiply spliced. US HIV RNA, MS HIV RNA, and HIV DNA were measured on sorted CD4<sup>+</sup> T cells.  $\rho$ = Spearman correlation co-efficient; P= p-value; na, not applicable.

**Table S3. Effects of anti-PD1 on HIV parameters according to CD4:CD8 strata.**

| HIV Assay                                      | Comparison       | CD4:CD8 < 0.5              | CD4:CD8 ≥ 0.5              | P (interaction) <sup>a</sup> |
|------------------------------------------------|------------------|----------------------------|----------------------------|------------------------------|
|                                                |                  | <i>Fold-change (95%CI)</i> | <i>Fold-change (95%CI)</i> |                              |
| Plasma HIV RNA                                 | D8 versus D1     | 0.39 (0.15, 1.01)          | 2.53 (0.99, 6.50)          | 0.053                        |
| Unspliced HIV RNA                              | D8 versus D1     | 1.00 (0.73, 1.36)          | 2.05 (1.41, 2.99)          | 0.004                        |
| HIV DNA                                        | D2 versus D1     | 0.65 (0.52, 0.81)          | 0.92 (0.77, 1.11)          | 0.017                        |
| HIV DNA                                        | D8 versus D1     | 0.86 (0.70, 1.05)          | 0.83 (0.63, 1.09)          | 0.8                          |
| Unspliced HIV RNA / HIV DNA                    | D8 versus D1     | 1.37 (0.91, 2.07)          | 2.44 (1.69, 3.54)          | 0.041                        |
| <i>Tat/rev</i> Induced Limiting Dilution Assay | EOT<C7 versus D1 | 0.71 (0.45, 1.11)          | 0.80 (0.63, 1.02)          | 0.63                         |
| <i>Tat/rev</i> Induced Limiting Dilution Assay | C7 versus D1     | 1.20 (0.95, 1.53)          | 1.85 (1.39, 2.48)          | 0.025                        |

Estimates from a mixed-effects negative binomial regression model are shown stratified by baseline CD4:CD8 ratio. <sup>a</sup>Wald test of multiplicative interaction term indicating strength of evidence that the fold-change estimates differ between strata of CD4:CD8 ratio. D, Day; EOT, end of treatment; C, cycle.

**Table S4. Antibodies used in cell sorting for single genome sequencing.**

| Antibody                      | Supplier       | Catalog number | RRID              |
|-------------------------------|----------------|----------------|-------------------|
| Anti-CD3 Phycoerythrin (PE)   | BD Biosciences | 555340         | RRID: AB_395746   |
| Anti-CD4 PE-Texas Red         | Invitrogen     | MHCD0417       | RRID: AB_1473480  |
| Anti-CCR7 Alexa Fluor 488     | BioLegend      | 353205         | RRID: AB_10918624 |
| Anti-CD27 Brilliant Violet711 | BD Biosciences | 563167         | RRID: AB_2738042  |
| Anti-CD45RA PE-Cy7            | BD Biosciences | 337167         | RRID: AB_647424   |
